# Supplementary material for: MitoTimer probe reveals the impact of autophagy, fusion, and motility on subcellular distribution of young and old mitochondrial protein and on relative mitochondrial protein age
Source: PubMed Central journal article supplement (PMC4028338; doi:10.4161/auto.26503), 2013-09-27
Supplement: auto-9-1887-s01.pdf [file auto-9-1887-s01.pdf]

## **Supplemental Material to:**

**Andrew W Ferree, Kyle Trudeau, Eden Zik, Ilan Y Benador,  
Roberta A Gottlieb, Orian S Shirihai**

**MitoTimer probe reveals the impact of autophagy, fusion,  
and motility on subcellular distribution of young and  
old mitochondrial protein and on relative mitochondrial  
protein age**

**Autophagy 2013; 9(11)**

**<http://dx.doi.org/10.4161/auto.26503>**

**[www.landesbioscience.com/journals/autophagy/article/26503](http://www.landesbioscience.com/journals/autophagy/article/26503)**

# Supplementary Figure 1

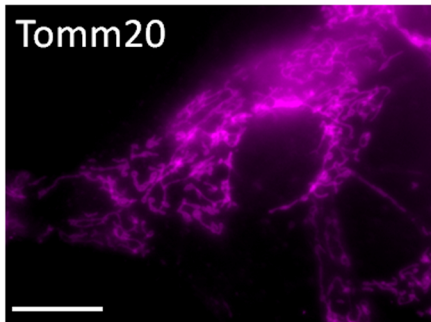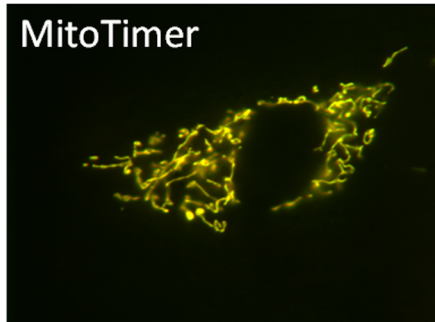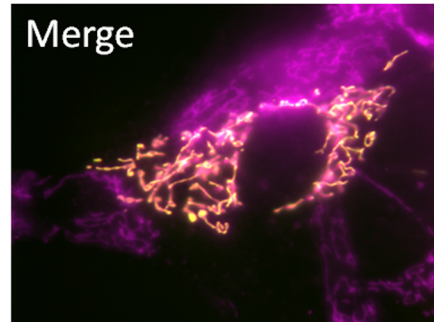

# Supplementary Figure 2

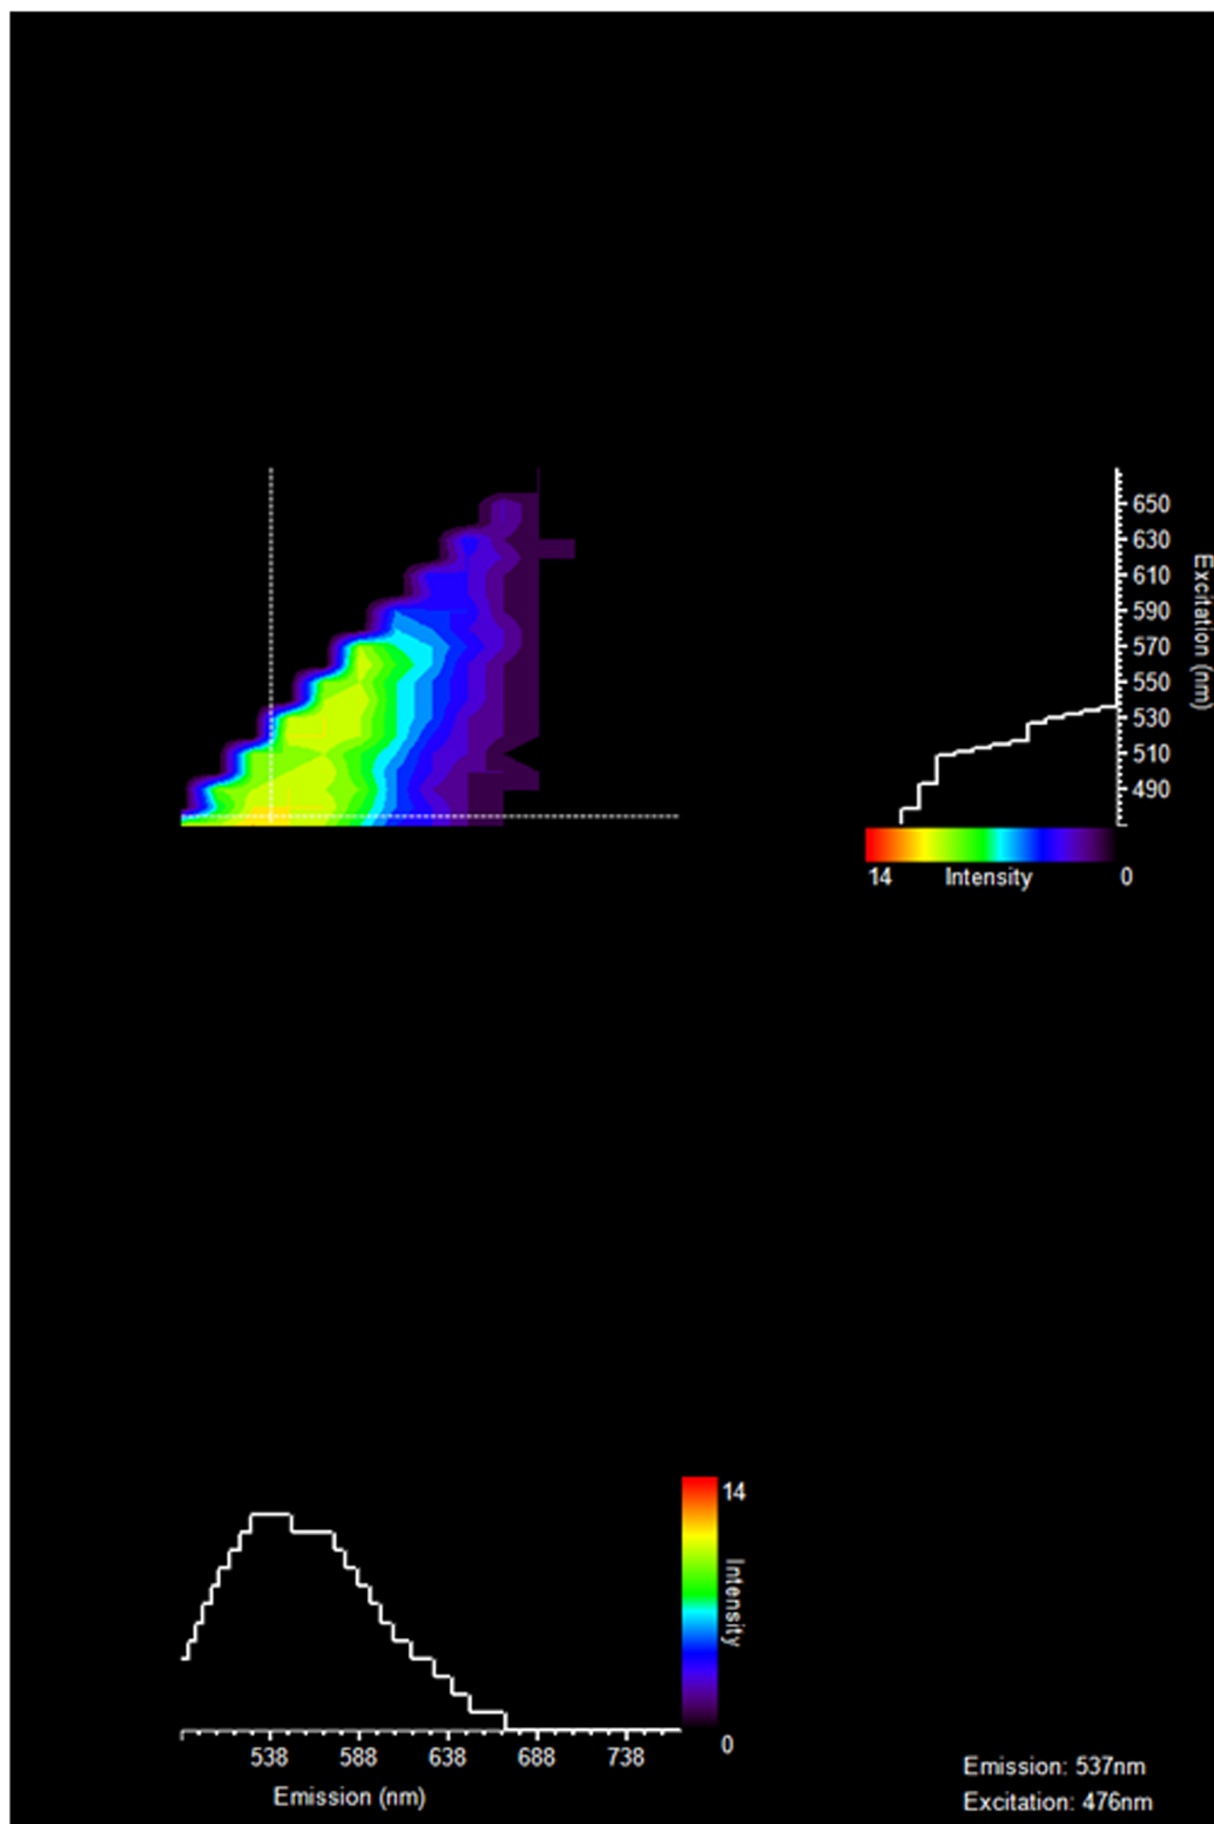

# Supplementary Figure 3

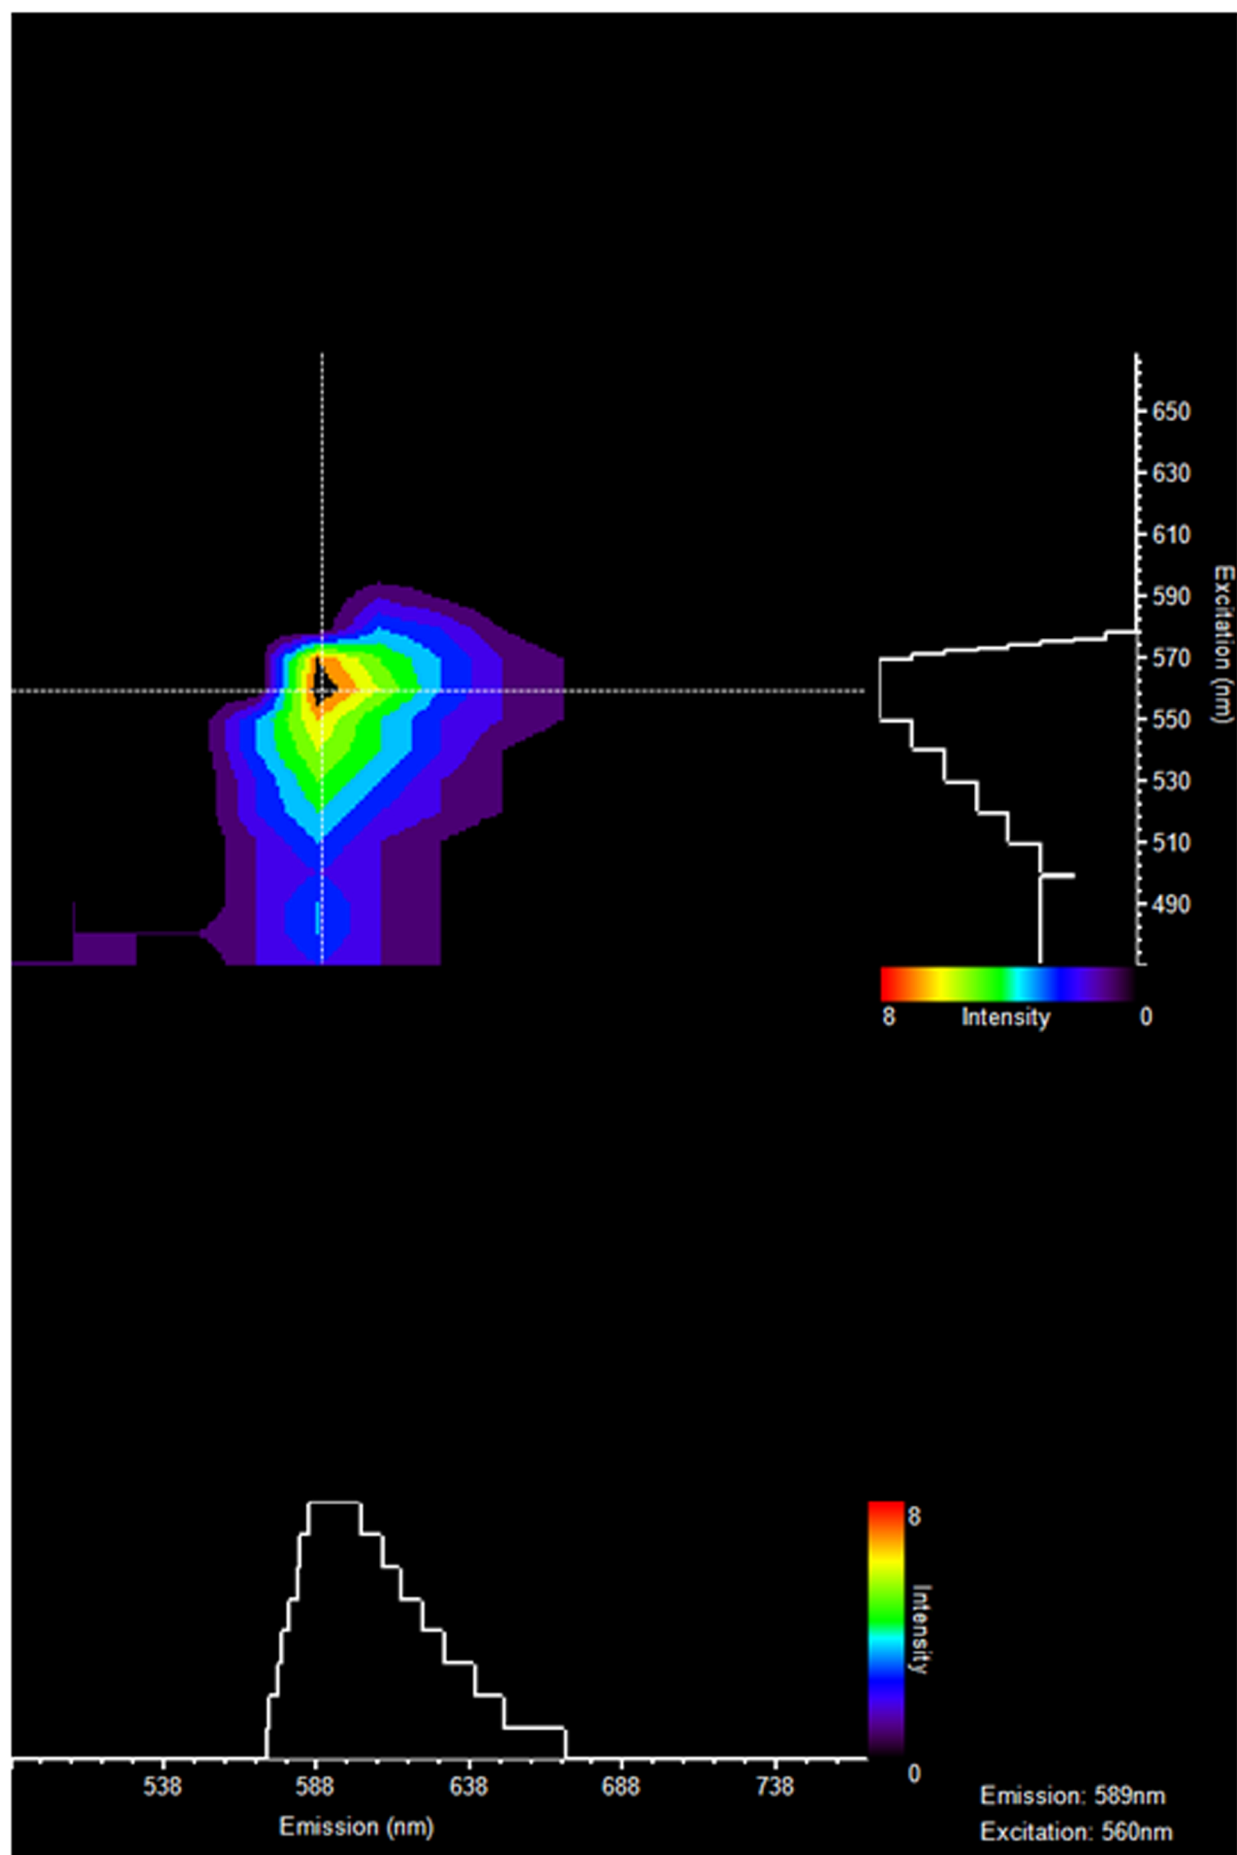



# Supplementary Figure 4

A

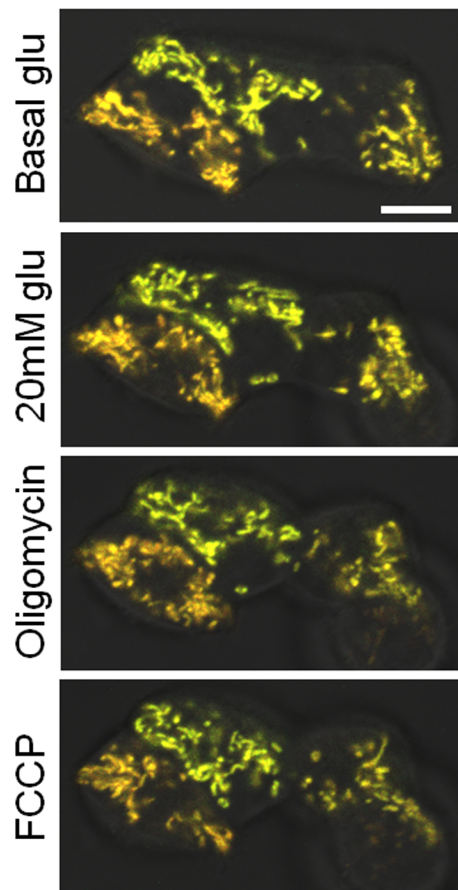

B

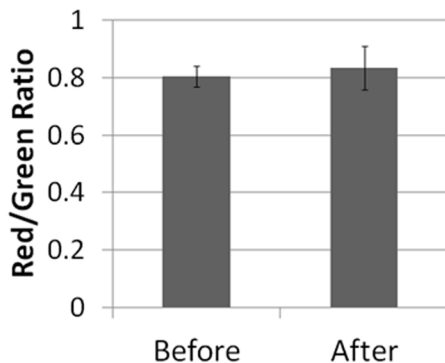

C

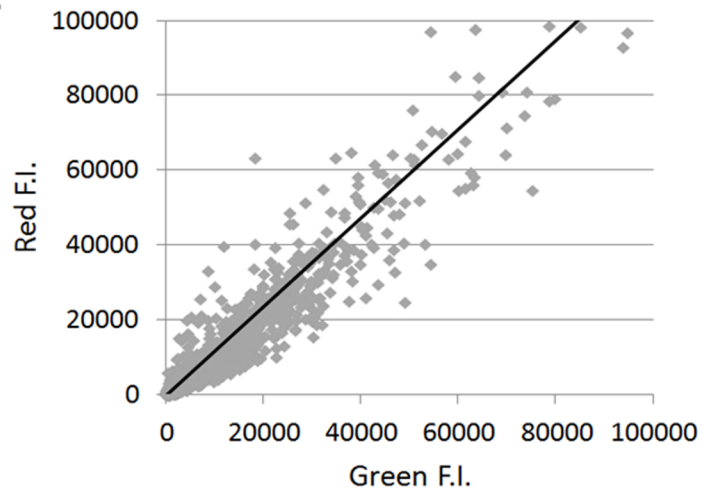

# Supplementary Figure 5

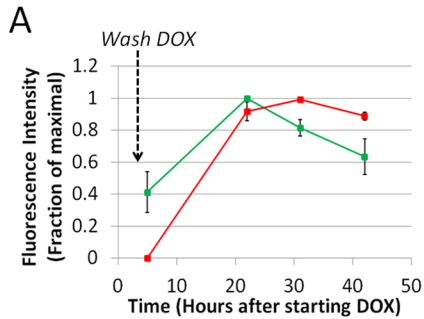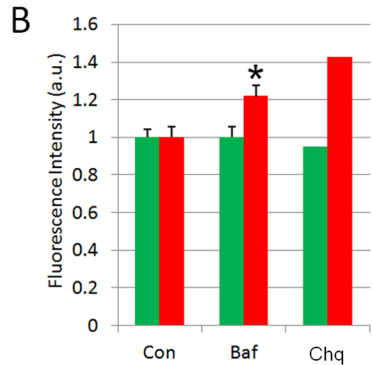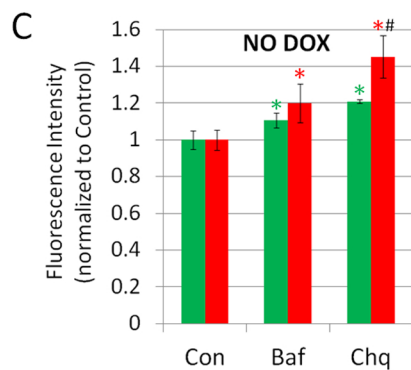

# Supplementary Figure 6

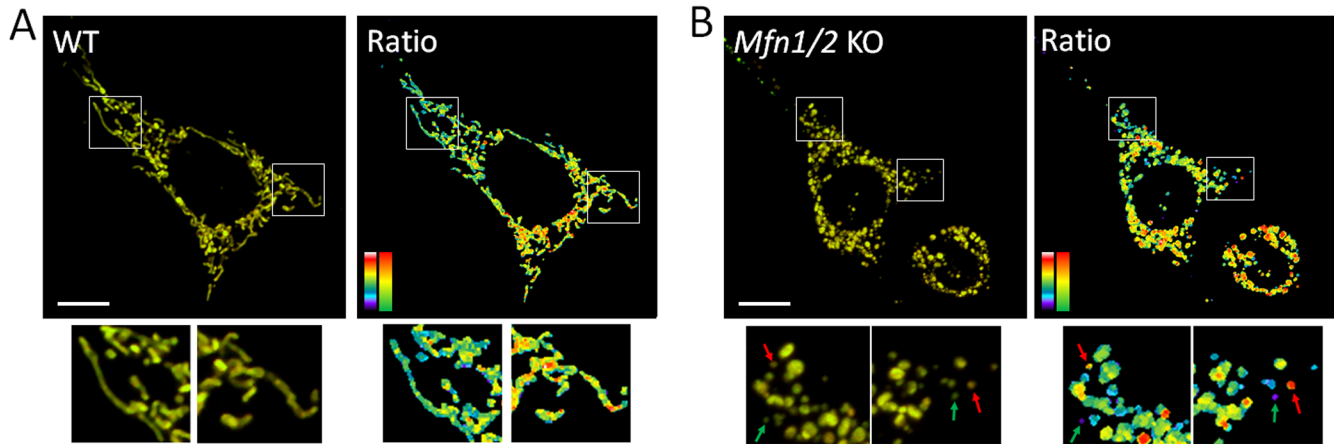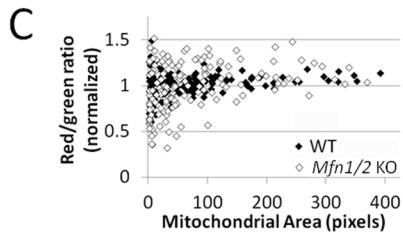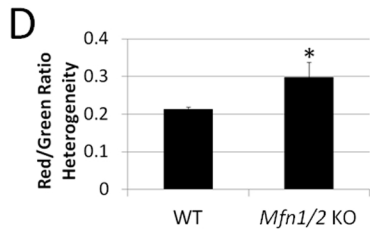

**Figure S1.** MitoTimer localizes to mitochondria in MEF cells. MitoTimer construct was transfected into MEF cells, and 24 h later cells were fixed and stained for TOMM20 conjugated with AlexaFluor405 secondary antibody (pseudo-colored magenta). MitoTimer is co-localized to mitochondria stained with TOMM20. Scale bar: 20  $\mu\text{m}$ .

**Figure S2.** Excitation/emission spectra of MitoTimer green fluorescence. Lambda-square scans were performed for sequential excitations produced by a white-light tunable laser in 10 nm steps and the maximal intensity recorded.

**Figure S3.** Excitation/Emission spectra of MitoTimer red fluorescence. Lambda-square scans were performed for sequential excitations produced by a white-light tunable laser in 10 nm steps and the maximal intensity recorded.

**Figure S4.** MitoTimer green and red fluorescence is unaffected by pH changes or protein expression level. **(A)** Images of INS1 cells stably-expressing MitoTimer showing red and green fluorescence at basal glucose levels. MitoTimer fluorescence was not affected by acute exposure to high glucose (20 mM glu, 15 minutes), oligomycin (5  $\mu\text{M}$ , 15 minutes), or FCCP (2  $\mu\text{M}$ , 15 minutes). Scale bar: 10  $\mu\text{m}$ . **(B)** COS cells stably-expressing MitoTimer were imaged and the red/green MitoTimer ratio was assessed. After fixation with 4% paraformaldehyde for 15 minutes followed by subsequent imaging, the red/green MitoTimer ratio was unchanged. **(C)** INS1 cells stably-expressing MitoTimer were analyzed by flow cytometry. Red and green MitoTimer fluorescence intensity (F.I.) increased with a linear relationship.

**Figure S5.** Limited synthesis or inhibition of autophagy increase the relative proportion of aged MitoTimer. **(A)** Pulsing MitoTimer production with 4 h of doxycycline (DOX) induction increases the proportion of red fluorescence over-time compared to continuous doxycycline induction (as shown in **Fig. 1D**). **(B)** Inhibition of autophagy with bafilomycin (Baf; 100 nM for 16 h) or chloroquine (Chq; 30  $\mu\text{g}/\text{mL}$ ) in MEF cells transiently expressing MitoTimer for 48 h leads to the

accumulation of red MitoTimer fluorescence (red bar) relative to green fluorescence (green bar) compared to control (Con) condition ( $*=p<0.05$ ,  $n=3$ ). (C) COS cells stably-expressing MitoTimer via continuous doxycycline (DOX) induction except for the last 24 h before imaging show significant accumulation of red fluorescence (red bar) relative to red fluorescence of control-untreated cells (red asterisk). Green fluorescence (green bar) in bafilomycin- and chloroquine-treated cells was also significantly increased (green asterisk) compared to control-untreated cells. In chloroquine-treated cells, the proportional increase in red was significantly greater (pound sign) than the increase in green MitoTimer ( $*P < 0.05$ ,  $\#P < 0.05$ ,  $n = 3$ ).

**Figure S6.** Lack of mitochondrial fusion in MEF or INS1 cells shows heterogeneity of MitoTimer age profile within the mitochondrial network. (A) Wild-type (WT) MEFs transiently expressing MitoTimer for 24 h show overall uniform yellow fluorescence of MitoTimer. Ratio image depicting red/green ratio of MitoTimer reveals relatively uniform age profiles among mitochondria in the cell. (B) Moderate heterogeneity of MitoTimer red/green ratio is seen in *Mfn1/2* KO MEFs expressing MitoTimer for 24 h. Green and red arrows indicate small mitochondria that are comparatively more green and red, respectively, than the majority of the mitochondrial population. Scale bar: 10  $\mu\text{m}$ . (C) Graph shows that smaller mitochondrial units display greater heterogeneity of MitoTimer ratio in *Mfn1/2* KO MEFs (white diamonds) compared to wild-type MEFs (WT, black diamonds) expressing MitoTimer for 24 h. (D) MitoTimer heterogeneity (standard deviation of red/green ratio for all mitochondria in the cell) is increased in *Mfn1/2* KO MEFs compared to wild-type (WT) ( $*P < 0.05$ ,  $n = 3$ ).
